1 **Epidemiology of *Burkholderia pseudomallei*, *Streptococcus suis*, *Salmonella***  
2 ***spp.*, *Shigella spp.* and *Vibrio spp.* infections in 111 hospitals in Thailand, 2022**

3  
4 Charuttaporn Jitpeera<sup>a</sup>, Somkid Kripattanapong<sup>a</sup>, Preeyarach Klaytong<sup>b</sup>, Chalida  
5 Rangsiwutisak<sup>b</sup>, Prapass Wannapinij<sup>b</sup>, Pawinee Doungngern<sup>a</sup>, Papassorn  
6 Pinyopornpanish<sup>c</sup>, Panida Chamawan<sup>d</sup>, Voranadda Srisuphan<sup>d</sup>, Krittiya  
7 Tuamsuwan<sup>d</sup>, Phairam Boonyarit<sup>d</sup>, Orapan Sripichai<sup>e</sup>, Soawapak Hinjoy<sup>f</sup>, John  
8 Stelling<sup>g</sup>, Paul Turner<sup>b,h,i</sup>, Wichan Bhunyakitikon<sup>a</sup>, Sapon Iamsirithaworn<sup>j</sup>, Direk  
9 Limmathurotsakul<sup>b,i,k\*</sup>

10

11 **Affiliation:**

12 <sup>a</sup> *Division of Epidemiology, Department of Disease Control, Ministry of Public Health,*

13 *Nonthaburi 11000, Thailand*

14 <sup>b</sup> *Mahidol-Oxford Tropical Medicine Research Unit, Faculty of Tropical Medicine, Mahidol*

15 *University, Bangkok, 10400, Thailand*

16 <sup>c</sup> *Division of Communicable Diseases, Department of Disease Control, Ministry of Public Health,*

17 *Nonthaburi, 11000, Thailand*

18 <sup>d</sup> *Health Administration Division, The Office of Permanent Secretary, Ministry of Public Health,*

19 *Nonthaburi, 11000, Thailand*

20 <sup>e</sup> *Department of Medical Science, Ministry of Public Health, Nonthaburi, 11000, Thailand (OS)*

21 <sup>f</sup> *Office of International Cooperation, Department of Disease Control, Ministry of Public Health,*

22 *Nonthaburi 11000, Thailand (SH)*

23 <sup>g</sup> *Brigham and Women's Hospital and Harvard Medical School, Boston, MA, United States (JS)*

24 <sup>h</sup> *Cambodia-Oxford Medical Research Unit, Angkor Hospital for Children, Siem Reap,*

25 *Cambodia*

26 <sup>i</sup> *Centre for Tropical Medicine and Global Health, University of Oxford, Oxford, United*

27 *Kingdom*

28 <sup>j</sup> *Department of Disease Control, Ministry of Public Health, Nonthaburi 11000, Thailand (SI)*

29 <sup>k</sup> *Department of Tropical Hygiene, Faculty of Tropical Medicine, Mahidol University, Bangkok,*

30 *10400, Thailand*

31

## 32 **ORCID**

33 Charuttaporn Jitpeera 0009-0007-9298-5853

34 Preeyarach Klaytong 0000-0002-9906-5159

35 Chalida Rangsiwutisak 0009-0007-9380-9085

36 Paul Turner 0000-0002-1013-7815

37 Direk Limmathurotsakul 0000-0001-7240-5320

38

39 \* **Corresponding author:** Prof. Direk Limmathurotsakul, Mahidol-Oxford Tropical Medicine

40 Research Unit, Faculty of Tropical Medicine, Mahidol University, 420/6 Rajvithi Road, Bangkok,

41 10400, Thailand. Tel: +66 2 203 6333, Fax: +66 2 354 9169, e-mail: [direk@tropmedres.ac](mailto:direk@tropmedres.ac)

42

43 **Abstract**

44 The information on notifiable diseases in low- and middle-income countries is often incomplete,  
45 limiting our understanding of their epidemiology. Our study addresses this knowledge gap by  
46 analyzing microbiology laboratory and hospital admission data from 111 of 127 public referral  
47 hospitals in Thailand, excluding Bangkok, from January to December 2022. We evaluated  
48 factors associated with the incidence of notifiable bacterial diseases (NBDs) caused by 11  
49 pathogens; including *Brucella* spp., *Burkholderia pseudomallei*, *Corynebacterium diphtheriae*,  
50 *Neisseria gonorrhoeae*, *Neisseria meningitidis*, non-typhoidal *Salmonella* spp. (NTS),  
51 *Salmonella enterica* serovar Paratyphi, *Salmonella enterica* serovar Typhi, *Shigella* spp.,  
52 *Streptococcus suis*, and *Vibrio* spp.. We used multivariable Poisson random-effects regression  
53 models. Additionally, we compared their yearly incidence rates in 2022 with those from 2012-  
54 2015 in hospitals where paired data were available. In 2022, the NBD associated with the highest  
55 total number of deaths was *B. pseudomallei* (4,407 patients; 1,219 deaths) infection, followed by  
56 NTS (4,501 patients; 461 deaths) and *S. suis* (867 patients, 134 deaths) infection. The incidence  
57 rate of *B. pseudomallei* and *S. suis* infection was highest in the northeast and upper central,  
58 respectively. The incidence rate of NTS infection was not associated with geographical region.  
59 The yearly incidence rate of *B. pseudomallei* and *S. suis* infection in 2022 were higher than those  
60 between 2012-2015, while those of fecal-oral transmitted NBDs including NTS infection,  
61 typhoid, shigellosis and vibriosis were lower. Overall, *B. pseudomallei* and *S. suis* infection are  
62 emerging and associated with a high number of deaths in Thailand. Specific public health  
63 interventions are warranted.

64

65 Keywords: melioidosis; salmonella; shigella; *Streptococcus suis*; vibrio; incidence; mortality

## 66 **Introduction**

67 Timely, reliable and complete information regarding notifiable diseases is essential for disease  
68 control and prevention, and enhancing our understanding of their epidemiology [1-3]. To achieve  
69 timeliness and completeness in data reporting, many high-income and upper-middle-income  
70 countries have strengthened their national surveillance systems by modernizing tools, technology  
71 and strategies [4-6]. These include automatic electronic laboratory-based reporting of notifiable  
72 diseases [5-7]. However, most low and middle-income countries (LMICs) have a shortage of  
73 resources, still use conventional or semi-automated data reporting systems, and do not  
74 automatically integrate laboratory data into their surveillance systems [4,8]. Therefore, the  
75 information available in the national surveillance systems of LMICs are still largely incomplete  
76 [9-11] and our understanding of their epidemiology remains limited.

77

78 In Thailand, the national surveillance systems monitors 13 dangerous communicable diseases  
79 and 57 notifiable diseases, overseen by the Department of Disease Control (DDC), Ministry of  
80 Public Health (MoPH) [12]. For the 13 dangerous communicable disease (e.g. Ebola and  
81 smallpox), immediate reporting of any suspected cases is required. For the 57 notifiable diseases,  
82 the reporting systems can be semi-automatic, utilizing the electronic data of final diagnosis based  
83 on the International Classification of Diseases, 10<sup>th</sup> revision (ICD-10) recorded in the hospital  
84 information systems (HIS). However, the ICD-10 is reliable only in few conditions [13,14] and  
85 the surveillance systems do not utilize microbiology laboratory data. Recent studies showed that  
86 many public hospitals, which have microbiology laboratories, do not report most cases and  
87 deaths following culture-confirmed notifiable bacterial diseases (NBDs) to the national

88 surveillance systems [11,15]. The incomplete data hinders efforts to improve awareness, control,  
89 prevention, and our understanding of NBDs in the country [16].

90  
91 To overcome limitations in LMICs, we developed the AMASS (AutoMated tool for  
92 Antimicrobial resistance Surveillance System), an offline application that enables hospitals to  
93 automatically analyse and generate standardized antimicrobial resistance (AMR) surveillance  
94 reports from routine microbiology and hospital data [17]. The AMASS version 1.0 was released  
95 on 1<sup>st</sup> February 2019 and tested in seven hospitals in seven countries [17]. We conceptualized  
96 that the AMASS could additionally analyse and generate summary reports for multiple NBDs  
97 [18]. The AMASS version 2.0 (AMASSv2.0) was released on 16<sup>th</sup> May 2022 and tested using  
98 data of 49 public hospitals in Thailand from 2012 to 2015 [15]. We demonstrate that national  
99 statistics on NBDs in LMICs could be improved by integrating information from readily  
100 available databases [15]. In 2023, collaborating with Health Administration Division, MoPH  
101 Thailand, we implemented AMASSv2.0 in 127 public hospitals in Thailand using the data from  
102 2022 [19]. We recently reported the epidemiology of AMR bloodstream infections in 111  
103 hospitals [20].

104  
105 Here we aimed to evaluate the epidemiology of multiple NBDs in 111 hospitals in Thailand  
106 using the data from 2022. We also examined the trends of each NBD by comparing the data from  
107 2022 with the data from 2012 to 2015.

108

## 109 **Methods**

### 110 *Study setting*

111 In 2022, Thailand had a population of 66.1 million, consisted of 77 provinces, and covered  
112 513,120 km<sup>2</sup>. The health systems in each province were integrated into 12 groups of provinces,  
113 known as health regions, plus the capital Bangkok as health region 13 (Figure 1), using the  
114 concept of decentralization [21]. The Health Administration Division, Ministry of Public Health  
115 (MoPH) Thailand, supervised 127 public referral hospitals in health regions 1 to 12. These  
116 included 35 advanced-level referral hospital (i.e. level A, with a bed size of about 500-1,200  
117 beds), 55 standard-level referral hospital (i.e. level S, with a bed size of about 300 to 500) and 37  
118 mid-level referral hospital (i.e. level M1, with a bed size of about 180-300) [22]. All level A and  
119 S hospitals, and most of level M1 hospitals were equipped with a microbiology laboratory  
120 capable of performing bacterial culture using standard methodologies for bacterial identification  
121 and susceptibility testing provided by the Department of Medical Sciences, MoPH, Thailand [23].

122  
123 From 16 December 2022 to 30 June 2023, on behalf of the Health Administration Division,  
124 MoPH, we invited and trained 127 public referral hospitals in health regions 1 to 12 to utilize the  
125 AMASS with their own microbiology and hospital admission data files via four online meetings,  
126 five face-to-face meetings and on-line support [20]. Subsequently, the hospitals that completed  
127 utilization of the AMASS submitted summary data generated by the tool to the MoPH [20].

### 128 129 *Study design*

130 We conducted a retrospective study evaluating epidemiology of selected NBDs diagnosed by  
131 culture using microbiology laboratory and hospital admission data from 2022. We also compared  
132 the yearly incidence rates of each NBD in 2022 with those from 2012-2015, using paired data  
133 from 49 public referral hospitals that were previously published [15].

134  
135 The NBDs under evaluation included infections caused by 12 pathogens; *Brucella* spp.,  
136 *Burkholderia pseudomallei*, *Corynebacterium diphtheriae*, *Neisseria gonorrhoeae*, *Neisseria*  
137 *meningitidis*, Non-typhoidal *Salmonella* spp., *Salmonella enterica* serovar Paratyphi, *Salmonella*  
138 *enterica* serovar Typhi, *Shigella* spp., *Streptococcus suis*, and *Vibrio* spp. infections. NBD cases  
139 were defined as having any clinical specimen (including blood, respiratory tract specimens, urine,  
140 stool, cerebrospinal fluid, genital swabs and other specimens) culture positive for a pathogen.  
141 The AMASS merged microbiology laboratory and hospital admission data using the hospital  
142 number (i.e. the patient identifier) present in both data files. Then, the AMASS deduplicated the  
143 data reporting total number of inpatients with a clinical specimen culture positive for a pathogen  
144 during the evaluation period.<sup>11</sup> Mortality was defined using the discharge summary (in the  
145 hospital admission data) which was routinely completed by the attending physician and reported  
146 to the MoPH. For each NBD, in case that a patient was admitted with that NBD more than once  
147 during the evaluation period, the mortality outcome of the first admission was presented.

148  
149 ***Statistical Analysis***

150 Data were summarized with medians and interquartile ranges (IQR) for continuous measures,  
151 and proportions for discrete measures. IQRs are presented in terms of 25th and 75th percentiles.  
152 Continuous variables and proportions were compared between groups using Kruskal Wallis tests  
153 and Chi-square tests, respectively.

154  
155 For NBDs with more than 100 cases in the year 2022, we evaluated factors associated with the  
156 incidence rate of NBDs per 100,000 population using multivariable Poisson random-effects

157 regression models [24]. The total number of NBD cases in each province was calculated by  
158 summing the number of NBD cases from all hospitals located in the same province. We assumed  
159 that the distribution of province-specific random effects was normal. Factors evaluated included  
160 health region, Gross Provincial Product (GPP), pig density and poultry density. Data of GPP in  
161 2021 [25] were used as a proxy for the size of the economy in each province. Pig density and  
162 poultry density (per square meters) were estimated by using the total number of pigs and poultry  
163 in each province in Thailand in 2022, divided by the total area of each province [26].

164  
165 Additionally, we compared the yearly incidence rates of each NBD in 2022 with the those  
166 between 2012-2015 in hospitals where paired data were available. Multivariable Poisson  
167 random-effects regression models were used to evaluate the change of incidence rate per 100,000  
168 population between the time periods. We also compared the total number of cases and deaths of  
169 each NBD diagnosed by culture in 2022 in our study with those of relevant notifiable diseases  
170 reported to the NNDSS of Thailand [27]. We used STATA (version 14.2; College Station,  
171 Texas) for all analyses (Appendix A).

172

### 173 *Data availability*

174 The hospital-level summary data used for the study are open-access and available at  
175 <https://figshare.com/s/79f2b4b9422263b9048b>.

176

### 177 *Ethics*

178 Ethical permission for this study was obtained from the Institute for the Committee of the  
179 Faculty of Tropical Medicine, Mahidol University (TMEC 23-085). Individual patient consent



180 was not sought as this was a retrospective study, and the Ethical and Scientific Review  
181 Committees approved the process.

182

## 183 **Results**

### 184 *Baseline characteristics*

185 Of 127 public referral hospitals, 116 (91%) used the AMASS to analyze their microbiology and  
186 hospital admission data files, and submitted the summary AMR and NBD data from 2022 to the  
187 MoPH. Four hospitals had incomplete microbiology data, and one hospital had incomplete  
188 hospital admission data. These hospitals were removed from the analysis. Therefore, a total of  
189 111 hospitals were included in the final analysis.

190

191 Of all public referral hospitals in Thailand, 100% of Level A hospitals (35/35), 89% of Level S  
192 hospitals (49/55) and 73% of Level M1 hospitals (27/37) were included in this study. Data were  
193 available from 74 of 77 provinces (96%) in Thailand, all provinces except Mae Hong Son,  
194 Nakorn Nayok and Bangkok.

195

196 A total of 46 hospitals in 42 provinces had paired data from 2022 and 2012-2015.

197

### 198 *Brucella spp.*

199 In 2022, there were 11 cases with culture-confirmed *Brucella* spp. infection (Figure 2A) and 1 of  
200 them died (in-hospital mortality 9%). Among provinces where paired data were available, the  
201 incidence rate did not differ between the time periods ( $p=0.15$ ).

202

203 ***B. pseudomallei***

204 In 2022, there were 4,407 cases with culture-confirmed *B. pseudomallei* infection and 1,219 of  
205 them died (in-hospital mortality 27.7%). The incidence rate (Figure 2B) was highest in the  
206 northeast (health regions 7, 8, 9 and 10), followed by the upper central (health region 3), north  
207 (health region 1 and 2) east (health region 6) and south (health region 11 and 12). The incidence  
208 rate was lowest in the lower central (health region 4) and west (health region 5). In the  
209 multivariable models, health region and poultry density (adjust incidence rate ratio [aIRR] 1.31,  
210 95% CI 1.02-1.69, p=0.04) were independently associated with the incidence of *B. pseudomallei*  
211 infection per 100,000 population (Table S1). GPP and pig density and poultry density were not  
212 independently associated with the incidence rate (both p>0.20)

213

214 Among provinces where paired data were available, the yearly incidence rate of *B. pseudomallei*  
215 infection in 2022 was higher than that between 2012-2015 by 58% (aIRR 1.58, 95% CI 1.49-1.68,  
216 p<0.001).

217

218 ***C. diphtheriae***

219 In 2022, there were 10 cases with culture-confirmed *C. diphtheriae* infection (Figure 2C) and 1  
220 of them died (in-hospital mortality 10%). Among provinces where paired data were available,  
221 the incidence rate did not differ between the time periods (p=0.29).

222

223 ***N. gonorrhoeae***

224 In 2022, there were 25 cases with culture-confirmed *N. gonorrhoeae* infection (Figure 2D) and  
225 none died. Among provinces where paired data were available, the incidence rate did not differ  
226 between the time periods ( $p=0.33$ ).

227

### 228 *N. meningitidis*

229 In 2022, there were 9 cases with culture-confirmed *N. meningitidis* infection (Figure 2E) and 2  
230 died (in-hospital mortality 22%). Among provinces where paired data were available, the  
231 incidence rate did not differ between the time periods ( $p=0.55$ ).

232

### 233 **Non-typhoidal *Salmonella* spp. (NTS)**

234 In 2022, there were 4,501 cases with culture-confirmed NTS infection (Figure 2F) and 461 died  
235 (in-hospital mortality 10.2%). In the multivariable models, health region, GPP, pig density and  
236 poultry density were not associated with the incidence rate (all  $p>0.20$ , Table S2).

237

238 Among provinces where paired data were available, the yearly incidence rate of NTS cases in  
239 2022 was lower than that between 2012-2015 by 37% (aIRR 0.63, 95%CI 0.60-0.67,  $p<0.001$ ).

240

### 241 *Salmonella enterica* serovar Paratyphi

242 In 2022, there were 30 cases with culture-confirmed *Salmonella enterica* serovar Paratyphi  
243 infection (Figure 2G) and 4 died (in-hospital mortality 13%). Among provinces where paired  
244 data were available, the incidence rate did not differ between the time periods ( $p=0.39$ ).

245

### 246 *Salmonella enterica* serovar Typhi

247 In 2022, there were 32 cases with culture-confirmed *Salmonella enterica* serovar Typhi infection  
248 (Figure 2H) and 6 died (in-hospital mortality 19%).

249  
250 Among provinces where paired data were available, the yearly incidence rate of *Salmonella*  
251 *enterica* serovar Typhi infection in 2022 was lower than that between 2012-2015 by 83% (aIRR  
252 0.17, 95%CI 0.07-0.41,  $p<0.001$ ).

253  
254 ***Shigella* spp.**

255 In 2022, there were 68 cases with culture-confirmed *Shigella* spp. infection (Figure 2I) and 4  
256 died (in-hospital mortality 6%).

257  
258 Among provinces where paired data were available, the yearly incidence rate of *Shigella* spp.  
259 infection in 2022 was lower than that between 2012-2015 by 78% (aIRR 0.22, 95%CI 0.14-0.36,  
260  $p<0.001$ ).

261  
262 ***S. suis***

263 In 2022, there were 867 cases with culture-confirmed *S. suis* infection and 134 of them died (in-  
264 hospital mortality 15.5%). The incidence rate (Figure 2J) was highest in the upper central (health  
265 regions 3), followed by the north (health regions 1 and 2) and northeast (health regions 7, 8, 9  
266 and 10). The incidence rate was lowest in the south (health regions 11 and 12) and lower central  
267 (health region 4). In the multivariable models, health region was associated with the incidence of  
268 *S. suis* infection per 100,000 population (Table S3). GPP, pig density and poultry density were  
269 not independently associated with the incidence rate.

270

271 Among provinces where paired data were available, the yearly incidence rate of *S. suis* infection  
272 in 2022 was higher than that between 2012-2015 by 172% (aIRR 2.72, 95%CI 2.29-3.24,  
273  $p<0.001$ ).

274

### 275 ***Vibrio* spp.**

276 In 2022, there were 809 cases with culture-confirmed *Vibrio* spp. infection and 122 of them died  
277 (in-hospital mortality 15.1%). The crude incidence rate (Figure 2K) was highest in the west  
278 (health region 5), followed by the east (health region 6). The crude incidence rate was lowest in  
279 the central (health region 3 and 4) and upper north (health region 1). In the multivariable models,  
280 health region was associated with the incidence of *Vibrio* spp. infection per 100,000 population  
281 (Table S4). GPP, pig density and poultry density were not independently associated with the  
282 incidence rate.

283

284 Among provinces where paired data were available, the yearly incidence rate of *Vibrio* spp.  
285 infection in 2022 was lower than that between 2012-2015 by 25% (aIRR 0.75, 95%CI 0.66-0.85,  
286  $p<0.001$ ).

287

### 288 ***Comparison with the national surveillance systems***

289 In 2022, the total number of cases (4,407 vs. 3,573 cases) and deaths (1,219 vs. 157 deaths)  
290 following *B. pseudomallei* infection diagnosed by culture was higher than those reported to the  
291 national surveillance systems (Table 1). The total number of cases (867 vs. 383 cases) and deaths  
292 (134 vs. 10 deaths) following *S. suis* infection diagnosed by culture was also higher. The total

293 number of deaths following fecal-oral transmitted NBDs diagnosed by culture (including 461 for  
294 non-typhoidal salmonella, 122 for vibriosis, 4 for paratyphoid, 6 for typhoid and 4 for  
295 shigellosis) were also higher than those reported to the national surveillance systems (0 deaths  
296 for all relevant fecal-oral transmitted NBDs).

297

298

## 299 **Discussion**

300 Our findings provide evidence that the incidences of melioidosis and *S. suis* infection are  
301 increasing and associated with a high number of deaths in Thailand in 2022. We also show that  
302 fecal-oral transmitted NBDs including non-typhoidal salmonellosis, typhoid, shigellosis and  
303 vibriosis are still present and associated with deaths, but their incidence rates are decreasing  
304 compared to the data from 2012-2015. This study highlights the potential advantage of utilization  
305 of routine microbiology and hospital admission data from hospitals. The local and timely data of  
306 NBDs can supplement and monitor the performance of the national surveillance systems. The  
307 accurate data can consequently identify diseases and areas with high burden, improve public  
308 health interventions, and prioritize resource allocation.

309

310 The finding that more than 1,200 deaths following melioidosis in 2022 is alarming. This finding  
311 is consistent with a previous modelling study predicting that the total number of deaths following  
312 melioidosis could range from 1,259 to 6,678 in Thailand if all patients were tested with bacterial  
313 culture and data were reported nationwide [28]. The increased incidence rate of melioidosis  
314 could be associated with the increasing incidence of diabetes (the major risk factor of  
315 melioidosis) and improvement of diagnostic stewardship (i.e. utilization of culture) and bacterial

316 identification in public hospitals in Thailand over time [16,29,30]. The association between  
317 poultry density and melioidosis is unclear, and could be a spurious finding. Further studies and  
318 actions to reduce the burden of melioidosis in Thailand are urgently needed [31].

319

320 Similarly, the increase in *S. suis* infection is alarming. This could be associated with an increase  
321 in consumption of undercooked pork products [32-34] and an increase in infected meat in the  
322 market [35]. The latter is a concern following the news of the large illegal pork imported to  
323 Thailand since 2021 after the shortage of domestic pork due to the outbreak of African swine  
324 fever in Thailand [36]. The DDC will utilize the data to additionally implement and enforce  
325 behavioral interventions, education and food biosafety in the country [34].

326

327 The decrease of multiple fecal-oral transmitted diseases could be due to improvement in clean  
328 water supply, sanitation and related health intervention programs over time [37,38]. The MoPH  
329 and related stakeholders should maintain and strengthen the public health interventions to  
330 decrease incidences of these infections further.

331

332 Our study and approach have several strengths. First, our study included most of the public  
333 referral hospitals in the country. Second, we utilize microbiology laboratory data, which is highly  
334 specific to the diagnosis of NBDs. Third, although our approach is semi-automatic, this approach  
335 is easy to scale up in LMICs because the AMASS programme is open-access, highly-compatible,  
336 and user-friendly without the need for data experts with adequate skills in statistical software  
337 [17,19].

338

339 Our study and approach have several limitations. First, our approach included only inpatients in  
340 the public referral hospitals. Therefore, our estimates did not include patients who did not require  
341 hospitalization, and those who were hospitalized in private, military or university hospitals.  
342 Nonetheless, majority of healthcare services in Thailand are in the public sector [39]. Second,  
343 our approach is not applicable in settings where microbiology and hospital admission data are  
344 not computerized. Third, our approach focused on bacterial culture results. Therefore, the  
345 findings could be influenced by diagnostic stewardship and, capability and expertise of the  
346 microbiology laboratories. Fourth, our approach utilizes summary data and could not evaluate  
347 individual-level clinical data and microbiology laboratory data in details. Fifth, the in-hospital  
348 mortality could be lower than the all-cause mortality because a preference to die at home is high  
349 in some regions in Thailand [11].

350

351 In conclusion, the burden of melioidosis and *S. suis* infection are increasing in Thailand. Their  
352 incidence rates are higher in some regions than in others. Specific public health interventions to  
353 reduce the burden of melioidosis and *S. suis* infection are urgently required.

354



355 **Acknowledgement**

356 We gratefully acknowledge the laboratory team and IT team of all hospitals for their  
357 participation and support.

358

359 **Declaration of interest statement**

360 The authors report there are no competing interests to declare.

361

362 **Funding**

363 This research was supported by the Wellcome Trust under Grant [number 224681/Z/21/Z]. For  
364 the purpose of Open Access, the author has applied a CC BY public copyright licence to any  
365 Author Accepted Manuscript version arising from this submission.

366

367 **References**

- 368 [1] White AE, Tillman AR, Hedberg C, et al. Foodborne Illness Outbreaks Reported to  
369 National Surveillance, United States, 2009-2018. *Emerg Infect Dis.* 2022 Jun;28(6):1117-  
370 1127.
- 371 [2] Nash K, Lai J, Sandhu K, et al. Impact of national COVID-19 restrictions on incidence of  
372 notifiable communicable diseases in England: an interrupted time series analysis. *BMC*  
373 *Public Health.* 2022 Dec 12;22(1):2318.
- 374 [3] Wei F, Sheng W, Wu X, et al. Incidence of anogenital warts in Liuzhou, south China: a  
375 comparison of data from a prospective study and from the national surveillance system.  
376 *Emerg Microbes Infect.* 2017 Dec 20;6(12):e113.
- 377 [4] Jayatileke K. Challenges in Implementing Surveillance Tools of High-Income Countries  
378 (HICs) in Low Middle Income Countries (LMICs). *Curr Treat Options Infect Dis.*  
379 2020;12(3):191-201.
- 380 [5] Vlieg WL, Fanoy EB, van Asten L, et al. Comparing national infectious disease  
381 surveillance systems: China and the Netherlands. *BMC Public Health.* 2017 May  
382 8;17(1):415.
- 383 [6] Panackal AA, M'Ikanatha N M, Tsui FC, et al. Automatic electronic laboratory-based  
384 reporting of notifiable infectious diseases at a large health system. *Emerg Infect Dis.*  
385 2002 Jul;8(7):685-91.
- 386 [7] Nguyen TQ, Thorpe L, Makki HA, et al. Benefits and barriers to electronic laboratory  
387 results reporting for notifiable diseases: the New York City Department of Health and  
388 Mental Hygiene experience. *Am J Public Health.* 2007 Apr;97 Suppl 1(Suppl 1):S142-5.

- 389 [8] Sahal N, Reintjes R, Aro AR. Review article: communicable diseases surveillance  
390 lessons learned from developed and developing countries: literature review. *Scand J*  
391 *Public Health*. 2009 Mar;37(2):187-200.
- 392 [9] Benson FG, Musekiwa A, Blumberg L, et al. Comparing laboratory surveillance with the  
393 notifiable diseases surveillance system in South Africa. *Int J Infect Dis*. 2017 Jun;59:141-  
394 147.
- 395 [10] Chandrasekar K, Mahesan S, Bath PA. Notifiable disease surveillance in Sri Lanka and  
396 the United Kingdom: a comparative study. *Sri Lanka J Bio Med Inform*. 2013;4(1):14-22.
- 397 [11] Hantrakun V, Kongyu S, Klaytong P, et al. Clinical Epidemiology of 7126 Melioidosis  
398 Patients in Thailand and the Implications for a National Notifiable Diseases Surveillance  
399 System. *Open Forum Infect Dis*. 2019 Dec;6(12):ofz498.
- 400 [12] Department of Disease Control, Ministry of Public Health, Thailand. Communicable  
401 Disease Act B.E. 2558 (A.D. 2015) Available from:  
402 [https://ddc.moph.go.th/law\\_gcd\\_eng.php](https://ddc.moph.go.th/law_gcd_eng.php)
- 403 [13] Rattanaumpawan P, Wongkamhla T, Thamlikitkul V. Accuracy of ICD-10 Coding  
404 System for Identifying Comorbidities and Infectious Conditions Using Data from a Thai  
405 University Hospital Administrative Database. *J Med Assoc Thai*. 2016 Apr;99(4):368-73.
- 406 [14] Sukanya C. Validity of Principal Diagnoses in Discharge Summaries and ICD-10 Coding  
407 Assessments Based on National Health Data of Thailand. *Healthc Inform Res*. 2017  
408 Oct;23(4):293-303.
- 409 [15] Lim C, Hantrakun V, Klaytong P, et al. Frequency and mortality rate following  
410 antimicrobial-resistant bloodstream infections in tertiary-care hospitals compared with  
411 secondary-care hospitals. *PLoS One*. 2024;19(5):e0303132.

- 412 [16] Hinjoy S, Hantrakun V, Kongyu S, et al. Melioidosis in Thailand: Present and Future.  
413 Trop Med Infect Dis. 2018;3(2):38.
- 414 [17] Lim C, Miliya T, Chansamouth V, et al. Automating the Generation of Antimicrobial  
415 Resistance Surveillance Reports: Proof-of-Concept Study Involving Seven Hospitals in  
416 Seven Countries. J Med Internet Res. 2020 Oct 2;22(10):e19762.
- 417 [18] Lim C, Klaytong P, Hantrakun V, et al. Automating the Generation of Notifiable  
418 Bacterial Disease Reports: Proof-of-Concept Study and Implementation in Six Hospitals  
419 in Thailand. Am J Trop Med Hyg. 2024 Jul 3;111(1):151-155.
- 420 [19] Srisuphan V, Klaytong P, Rangsiwutisak C, et al. Local and timely antimicrobial  
421 resistance data for local and national actions: the early implementation of an automated  
422 tool for data analysis at local hospital level in Thailand. JAC Antimicrob Resist. 2023  
423 Aug;5(4):dlad088.
- 424 [20] Tuamsuwan K, Chamawan P, Boonyarit P, et al. Frequency of antimicrobial-resistant  
425 bloodstream infections in Thailand, 2022. medRxiv. 2024:2024.06.01.24308013.
- 426 [21] Jongudomsuk P, Srithamrongsawat S, Patcharanarumol W, et al. The Kingdom of  
427 Thailand Health System Review 2015. Available from:  
428 [https://iris.who.int/bitstream/handle/10665/208216/9789290617136\\_eng.pdf](https://iris.who.int/bitstream/handle/10665/208216/9789290617136_eng.pdf)
- 429 [22] Ministry of Public Health, Thailand. List of Healthcare Facilities under Health  
430 Administration Division, Ministry of Public Health, Thailand 2023. 2023. Available  
431 form: <http://dmsic.moph.go.th/index/detail/9188>
- 432 [23] Department of Medical Science, Ministry of Public Health, Thailand. Manual for  
433 microbiology laboratories at regional and general hospitals. 2012. Available from:  
434 <http://narst.dmsc.moph.go.th/data/Idenbook.pdf>

- 435 [24] Austin PC, Stryhn H, Leckie G, et al. Measures of clustering and heterogeneity in  
436 multilevel Poisson regression analyses of rates/count data. *Stat Med*. 2018 Feb  
437 20;37(4):572-589.
- 438 [25] National Statistical Office, Ministry of Digital Economy and Society, Thailand.  
439 Statistical Yearbook Thailand 2023. 2023. Available from:  
440 <https://www.nso.go.th/public/e-book/Statistical-Yearbook/SYB-2023>
- 441 [26] Information and Communication Technology Center, Department of Livestock  
442 Development, Ministry of Agriculture and Cooperatives, Thailand. Information of  
443 animal-raising farmers at the provincial level, 2022. 2022. Available from:  
444 [https://ict.dld.go.th/webnew/index.php/th/service-ict/report/396-report-thailand-  
445 livestock/reportservey2565/1711-province-2565](https://ict.dld.go.th/webnew/index.php/th/service-ict/report/396-report-thailand-livestock/reportservey2565/1711-province-2565)
- 446 [27] Department of Disease Control, Ministry of Public Health, Thailand. National Disease  
447 Surveillance (Report 506). 2023. Available from: <http://doe.moph.go.th/surdata/>
- 448 [28] Limmathurotsakul D, Golding N, Dance DA, et al. Predicted global distribution of  
449 *Burkholderia pseudomallei* and burden of melioidosis. *Nat Microbiol*. 2016 Jan 1;1(1).
- 450 [29] Greer RC, Wangrangsimakul T, Amornchai P, et al. Misidentification of *Burkholderia*  
451 *pseudomallei* as *Acinetobacter* species in northern Thailand. *Trans R Soc Trop Med Hyg*.  
452 2019 Jan 1;113(1):48-51.
- 453 [30] Mahikul W, White LJ, Poovorawan K, et al. Modelling population dynamics and  
454 seasonal movement to assess and predict the burden of melioidosis. *PLoS Negl Trop Dis*.  
455 2019 May;13(5):e0007380.

- 456 [31] Department of Disease Control, Ministry of Public Health, Thailand. Guideline of  
457 Melioidosis. 2021. Available from:  
458 <http://klb.ddc.moph.go.th/dataentry/handbook/form/129>
- 459 [32] Takamatsu D, Wongsawan K, Osaki M, et al. Streptococcus suis in humans, Thailand.  
460 Emerg Infect Dis. 2008 Jan;14(1):181-3.
- 461 [33] Takeuchi D, Kerdsin A, Akeda Y, et al. Impact of a Food Safety Campaign on  
462 Streptococcus suis Infection in Humans in Thailand. Am J Trop Med Hyg. 2017  
463 Jun;96(6):1370-1377.
- 464 [34] Kerdsin A, Segura M, Fittipaldi N, et al. Sociocultural Factors Influencing Human  
465 Streptococcus suis Disease in Southeast Asia. Foods. 2022 Apr 20;11(9).
- 466 [35] Pappas G. Socio-economic, industrial and cultural parameters of pig-borne infections.  
467 Clin Microbiol Infect. 2013 Jul;19(7):605-10.
- 468 [36] Bangkok Post. Fighting pork smugglers. 2023. Available from:  
469 <https://www.bangkokpost.com/opinion/opinion/2667934/fighting-pork-smugglers>
- 470 [37] Boonsoong B, Sangpradub N, Barbour MT, et al. An implementation plan for using  
471 biological indicators to improve assessment of water quality in Thailand. Environ Monit  
472 Assess. 2010 Jun;165(1-4):205-15.
- 473 [38] Techasaensiri C, Radhakrishnan A, Als D, et al. Typhoidal Salmonella Trends in  
474 Thailand. Am J Trop Med Hyg. 2018 Sep;99(3\_Suppl):64-71.
- 475 [39] Sumriddetchkajorn K, Shimazaki K, Ono T, et al. Universal health coverage and primary  
476 care, Thailand. Bull World Health Organ. 2019 Jun 1;97(6):415-422.

477

478

479 **Figure legends**

480 **Figure 1.** Health regions in Thailand

481 **Footnote of figure 1.** National Health Security Office (NHSO) Region 1 is in Chiang Mai, 2 in  
482 Phitsanulok, 3 in Nakhonsawan, 4 in Saraburi, 5 in Ratchaburi, 6 in Rayong, 7 in Khon Kaen, 8  
483 in Udon Thani, 9 in Nakhonratchasima, 10 in Ubonratchathani, 11 in Suratthani, 12 in Songkhla  
484 and 13 in Bangkok.

485

486 **Figure 2.** Incidence rate of cases with notifiable bacterial diseases diagnosed by culture per  
487 100,000 population in 2022 in Thailand

488

489 **Table 1. Total number of cases and deaths following selected notifiable bacterial diseases (NBDs) diagnosed by culture in 111**  
 490 **hospitals) compared with total number of cases and deaths with relevant notifiable diseases reported to the national**  
 491 **surveillance systems (NSS) in Thailand in 2022.**

| <b>Total number of cases *</b>                                        | <b>This study</b> | <b>Relevant notifiable diseases in the NSS</b> | <b>NSS</b>   |
|-----------------------------------------------------------------------|-------------------|------------------------------------------------|--------------|
| <i>Brucella</i> spp. infection                                        | 11                | Brucellosis                                    | 15           |
| <i>Burkholderia pseudomallei</i> infection                            | 4,407             | Melioidosis                                    | 3,573        |
| <i>Corynebacterium diphtheriae</i> infection                          | 10                | Diphtheria                                     | 0            |
| <i>Neisseria gonorrhoeae</i> infection                                | 25                | Gonorrhea                                      | 6,915        |
| <i>Neisseria meningitidis</i> infection                               | 9                 | Meningococcal meningitis                       | 19           |
| Non-typhoidal <i>Salmonella</i> spp. and <i>Vibrio</i> spp. infection | 4,501 and 809     | Food poisoning and cholera                     | 72,439 and 4 |
| <i>Salmonella enterica</i> serovar Paratyphi infection                | 30                | Paratyphoid                                    | 91           |
| <i>Salmonella enterica</i> serovar Typhi infection                    | 32                | Typhoid                                        | 754          |
| <i>Shigella</i> spp. infection                                        | 68                | Bacillary dysentery                            | 377          |
| <i>Streptococcus suis</i> infection                                   | 867               | <i>Streptococcus suis</i> infection            | 383          |
| <b>Total number of deaths</b>                                         |                   |                                                |              |
| <i>Brucella</i> spp. infection                                        | 1                 | Brucellosis                                    | 0            |
| <i>Burkholderia pseudomallei</i> infection                            | 1,219             | Melioidosis                                    | 157          |
| <i>Corynebacterium diphtheriae</i> infection                          | 1                 | Diphtheria                                     | 0            |
| <i>Neisseria gonorrhoeae</i> infection                                | 0                 | Gonorrhea                                      | 0            |
| <i>Neisseria meningitidis</i> infection                               | 2                 | Meningococcal meningitis                       | 3            |
| Non-typhoidal <i>Salmonella</i> spp. and <i>Vibrio</i> spp. infection | 461 and 122       | Food poisoning and cholera                     | 0 and 0      |
| <i>Salmonella enterica</i> serovar Paratyphi infection                | 4                 | Paratyphoid                                    | 0            |
| <i>Salmonella enterica</i> serovar Typhi infection                    | 6                 | Typhoid                                        | 0            |
| <i>Shigella</i> spp. infection                                        | 4                 | Bacillary dysentery                            | 0            |
| <i>Streptococcus suis</i> infection                                   | 134               | <i>Streptococcus suis</i> infection            | 10           |

492  
 493 \* Case was defined as an inpatient with a clinical specimen culture positive for a pathogen during the evaluation period, while the NSS included  
 494 reports of suspected, probable and confirmed cases using a wide range of case definitions of each notifiable disease (Appendix B).



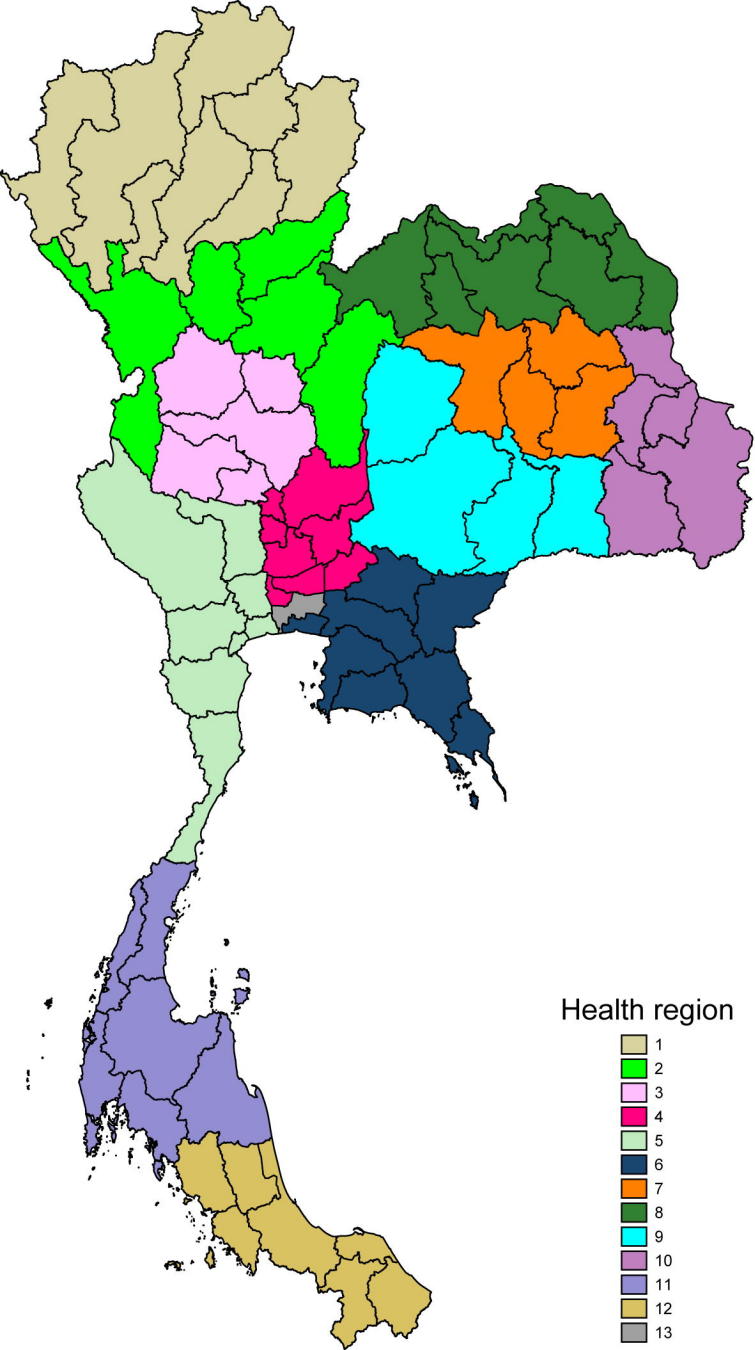

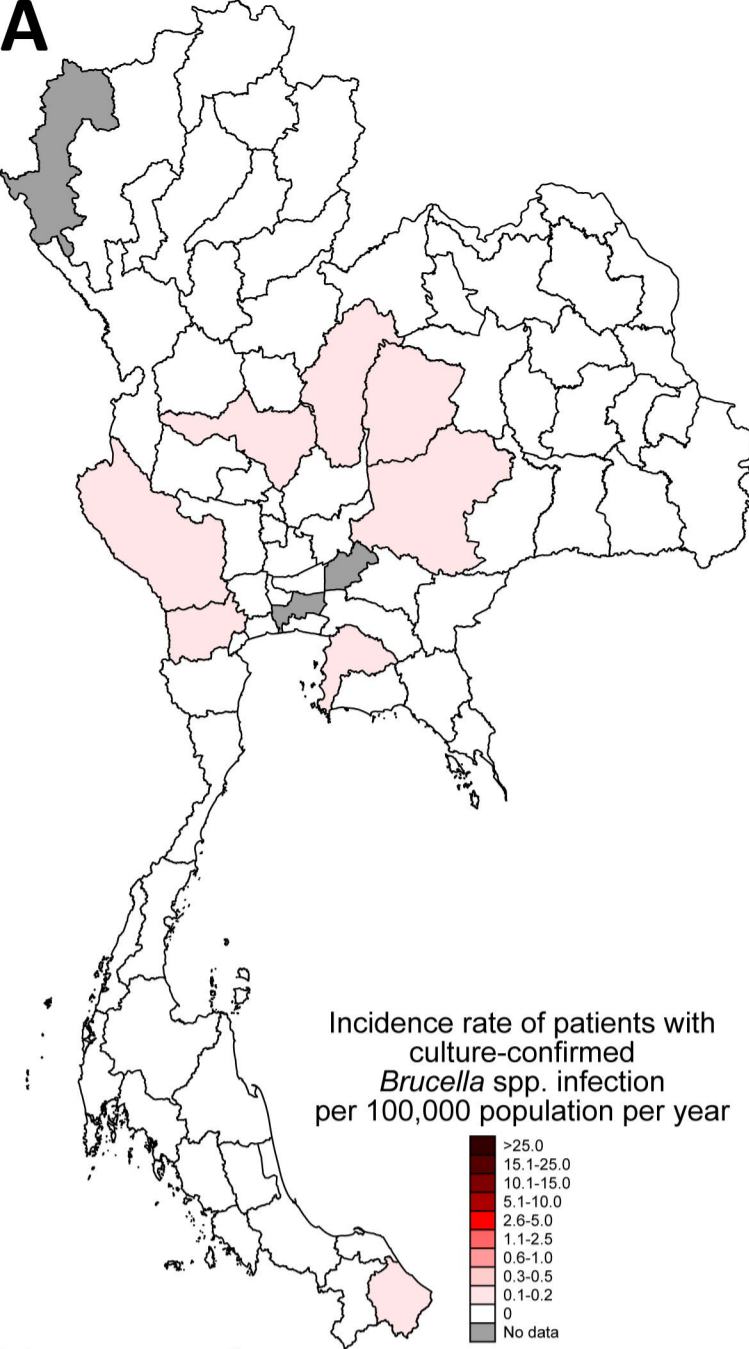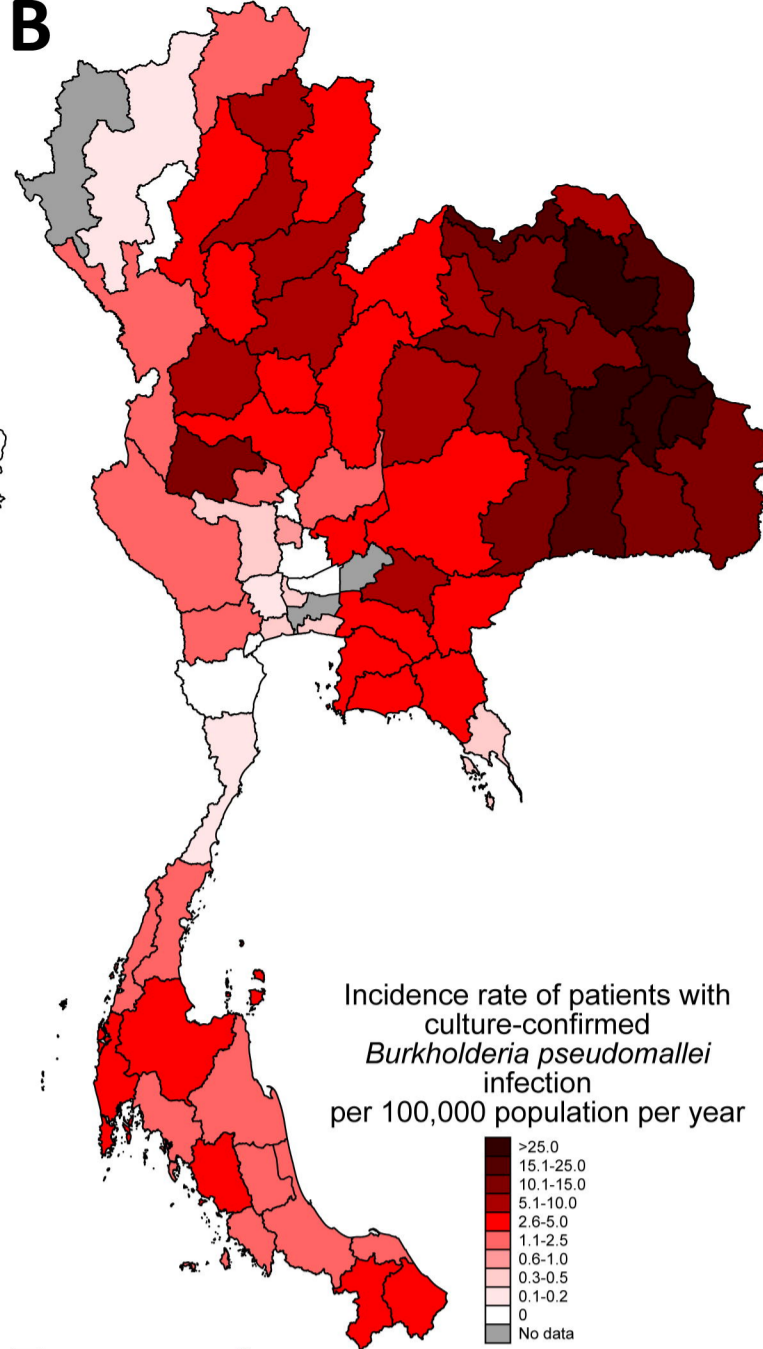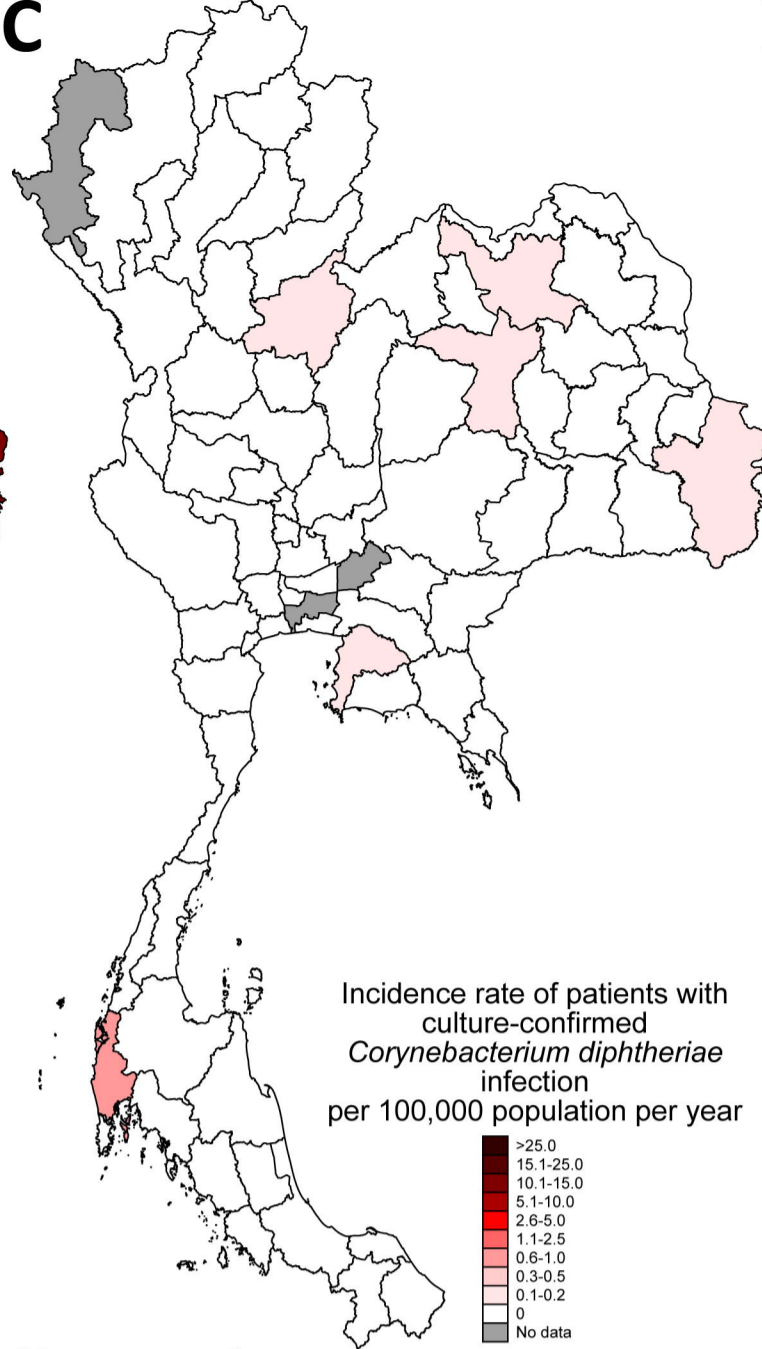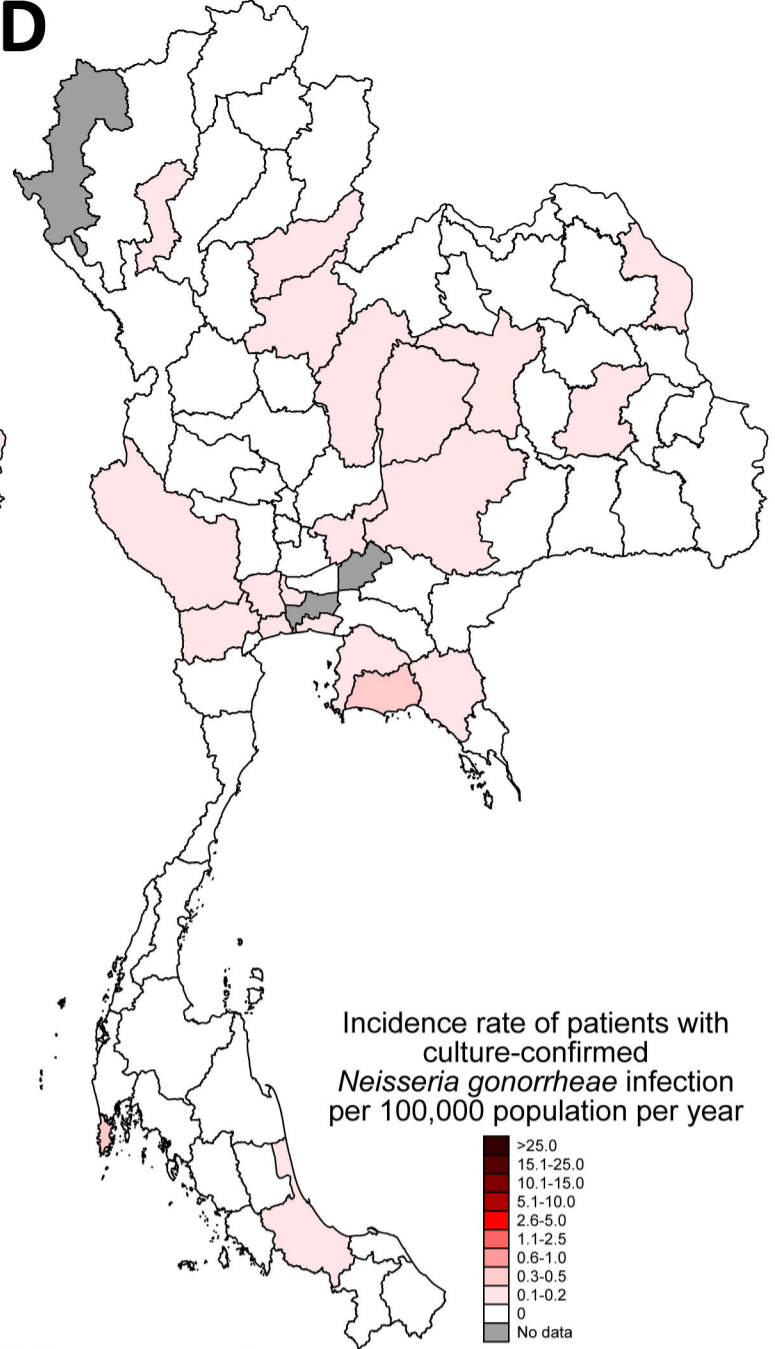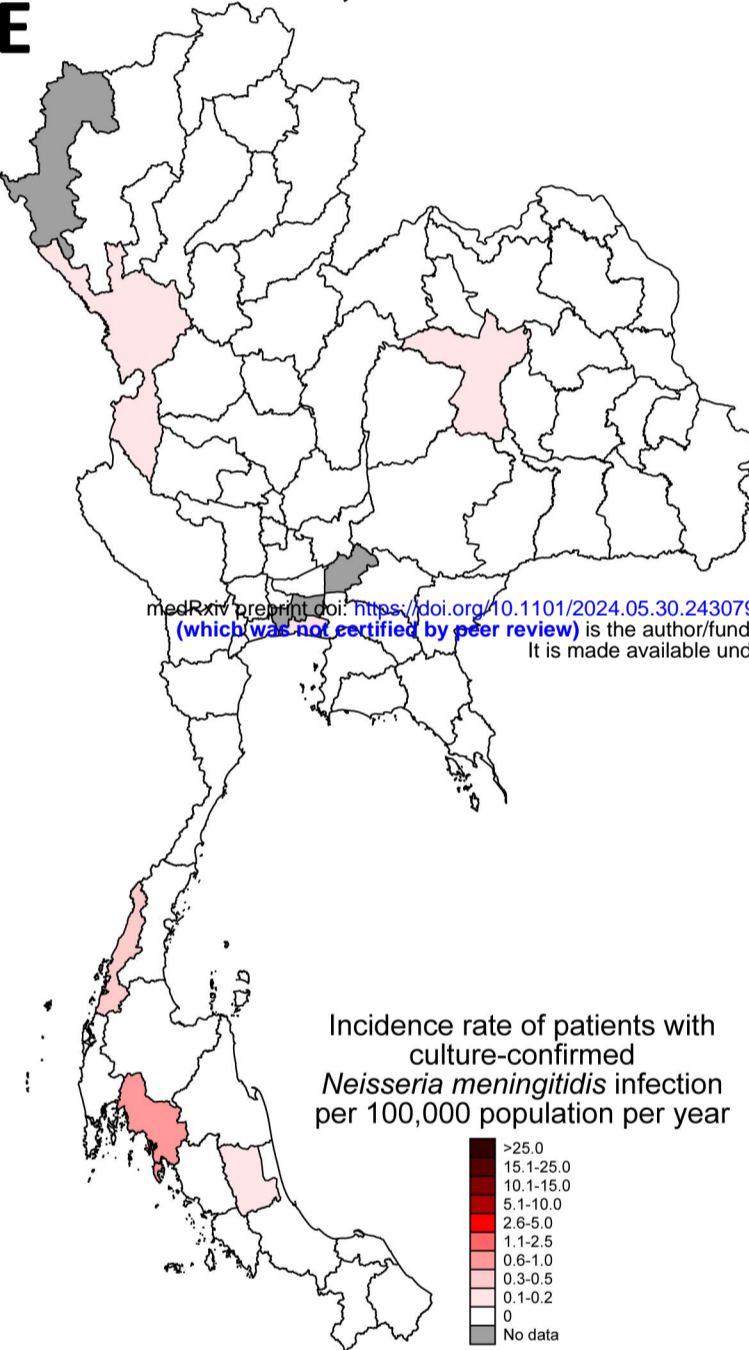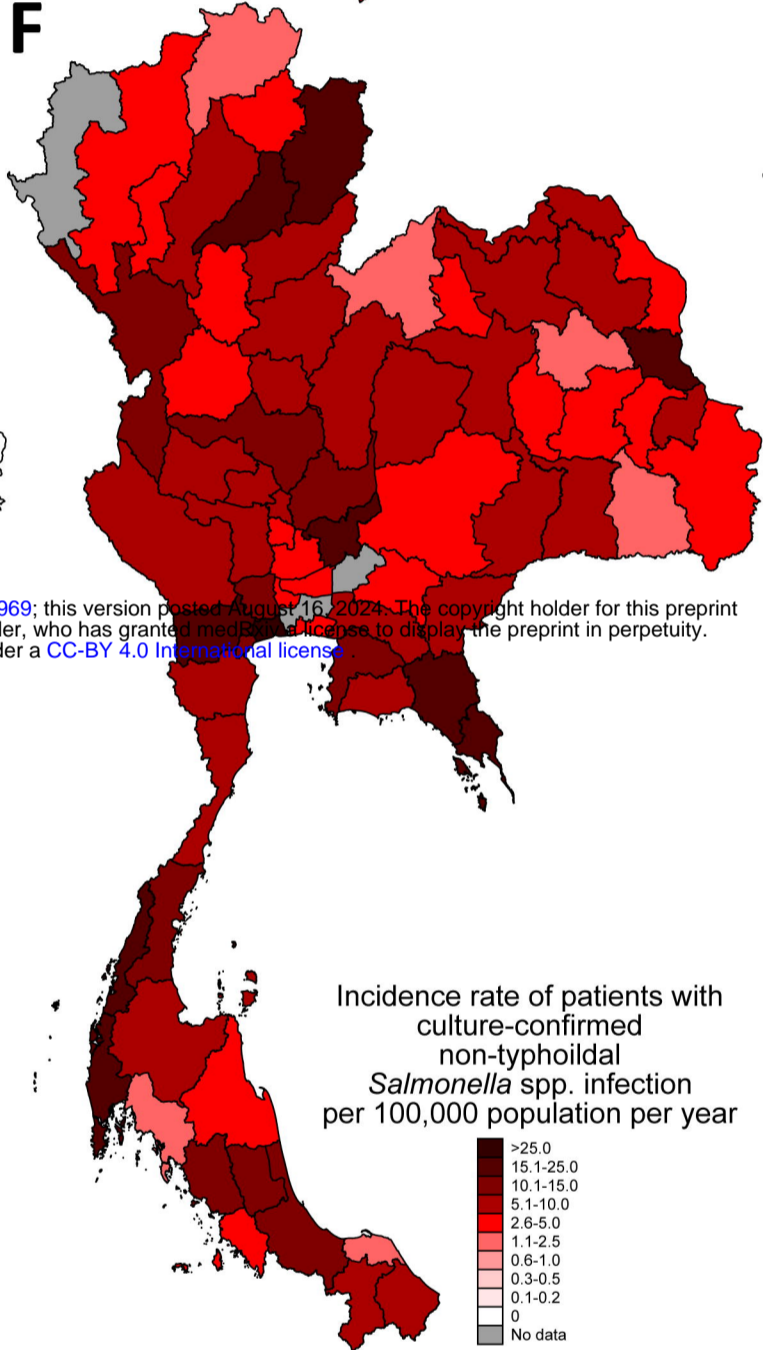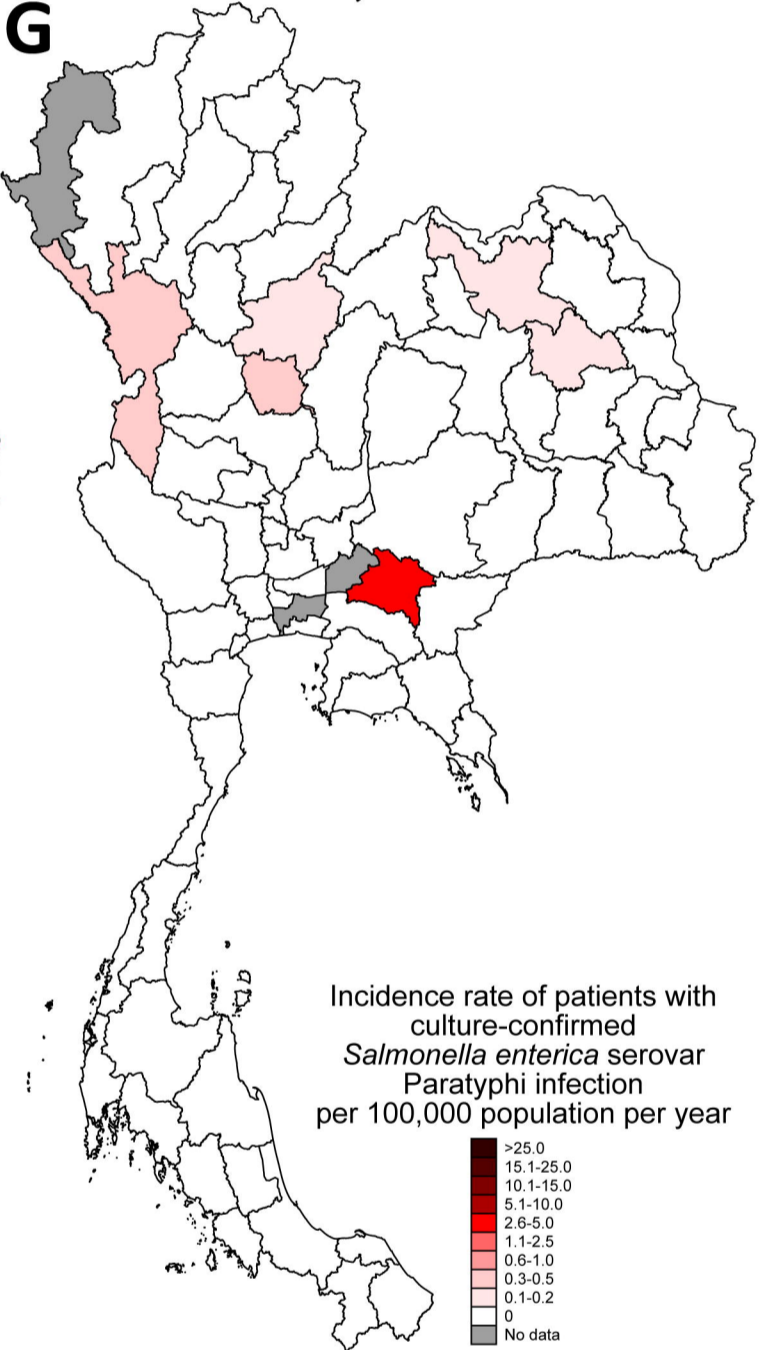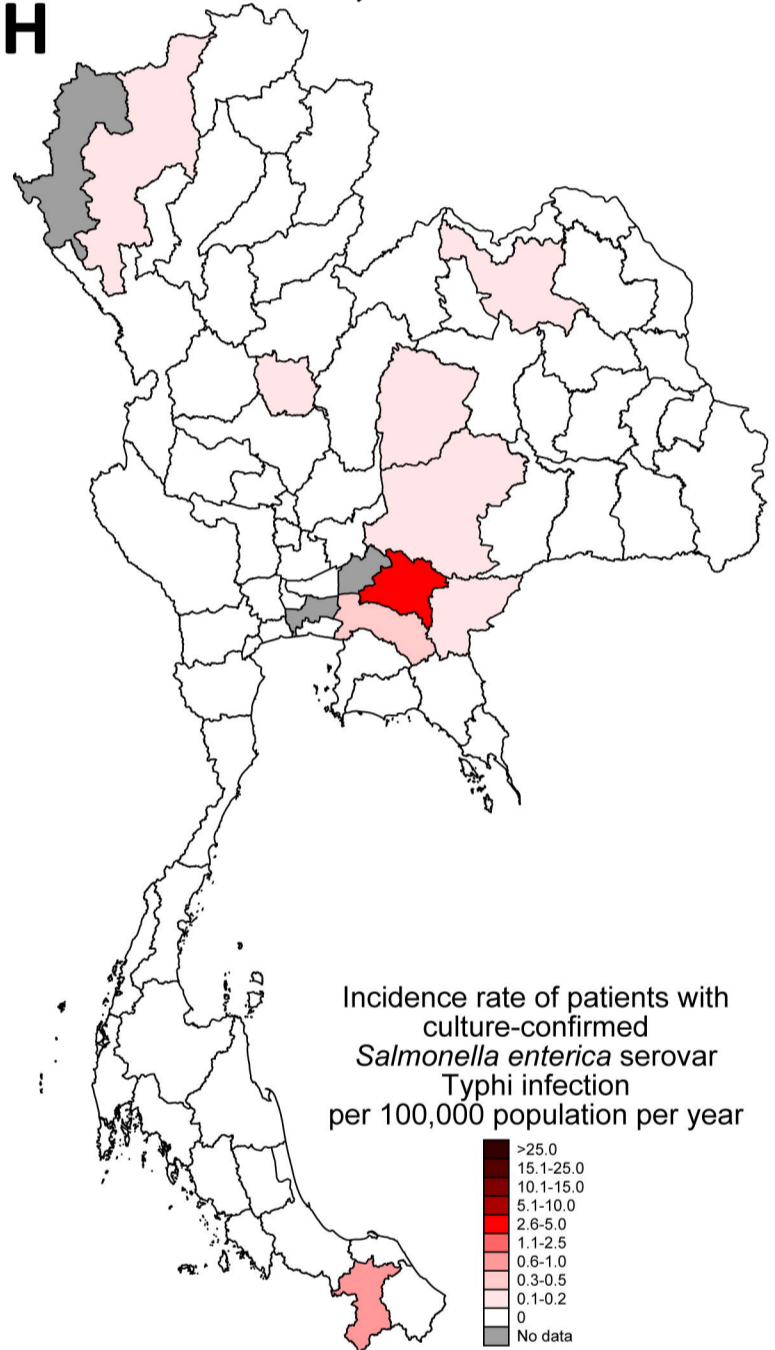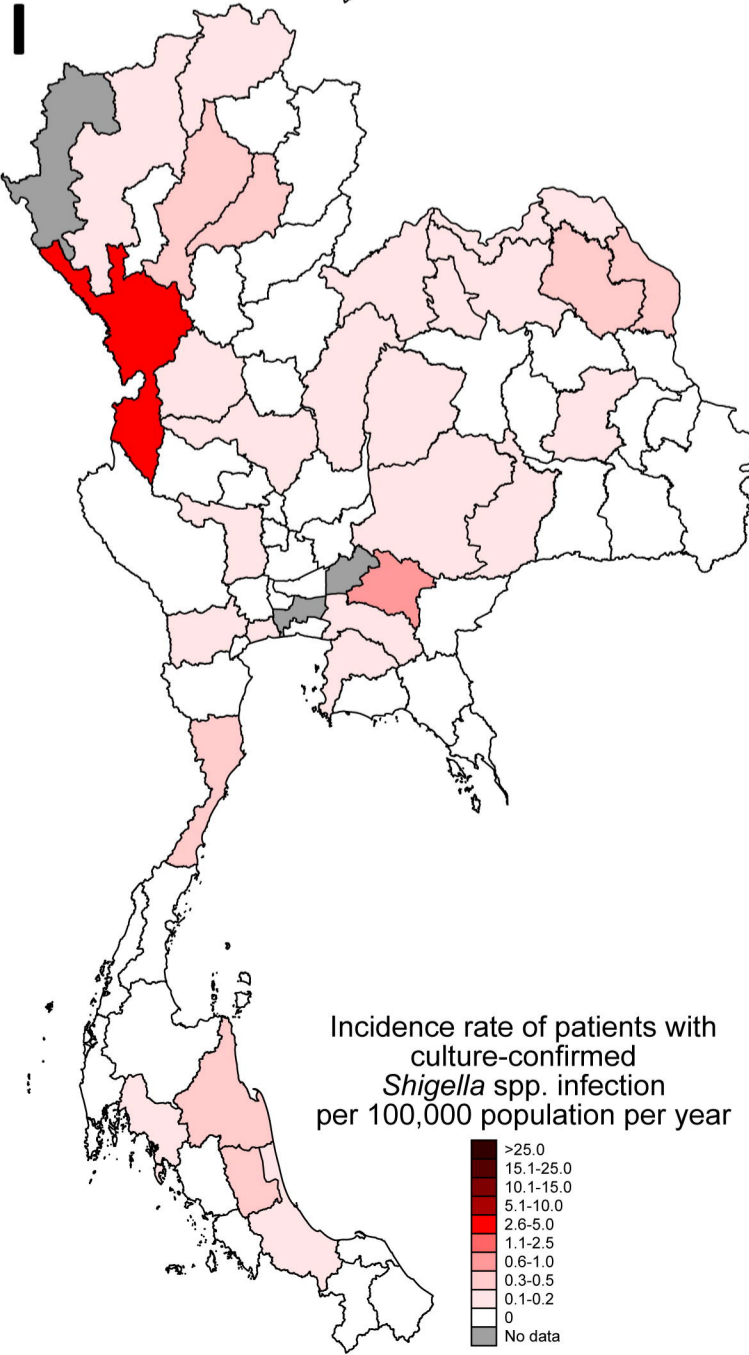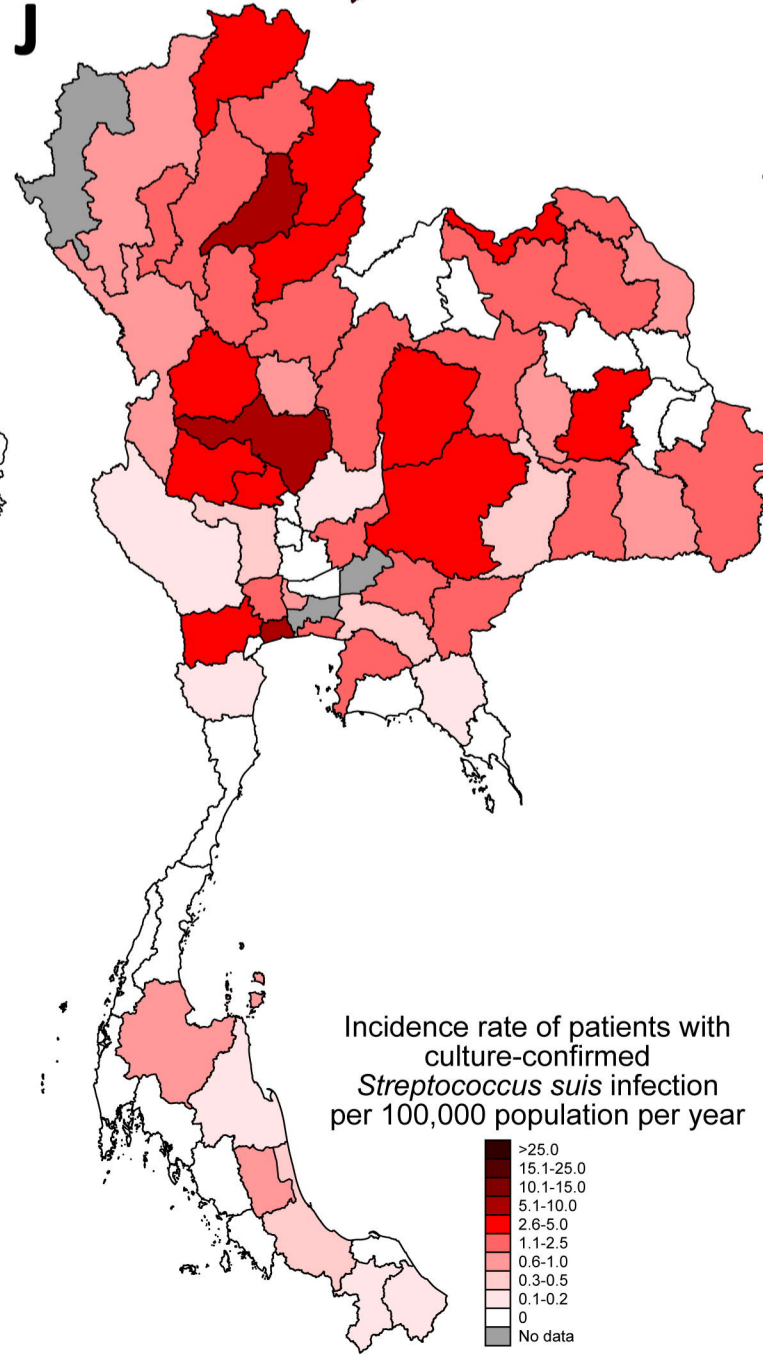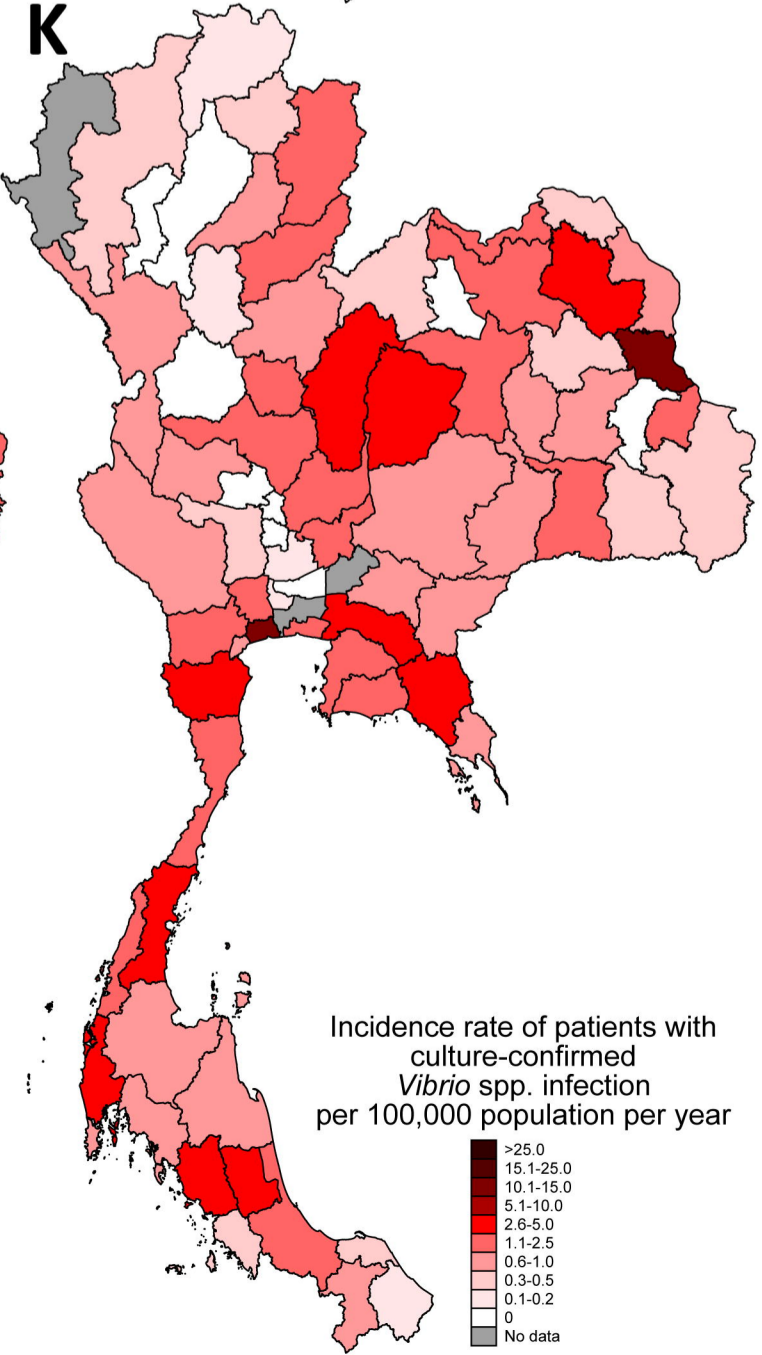

medRxiv preprint doi: <https://doi.org/10.1101/2024.05.30.24307969>; this version posted August 16, 2024. The copyright holder for this preprint (which was not certified by peer review) is the author/funder, who has granted medRxiv a license to display the preprint in perpetuity. It is made available under a [CC-BY 4.0 International license](https://creativecommons.org/licenses/by/4.0/).
